# Supplementary material
Source: PubMed Central journal article supplement (PMC5108876)
Supplement: MCB.00281-16_zmb999101350so1.pdf [file MCB.00281-16_zmb999101350so1.pdf]

## Supplementary Information

### Supplementary Figures and Tables List:

**Supplementary Figure 1** - *Tg(fli1a:egfp)<sup>y1</sup>*, *Tg(gata1:dsred)<sup>sd2</sup>* transgenic, *zap70<sup>y442</sup>* homozygous mutant zebrafish have normal vascular and lymphatic development.

**Supplementary Figure 2** - *rag1* and *rag2* is expressed in lymphocyte progenitors of *zap70<sup>y442</sup>* mutants at 5 dpf.

**Supplementary Figure 3** - Moribund homozygous *zap70<sup>y442</sup>* mutants develop opportunistic infections.

**Supplementary Figure 4** - Erythroid, myeloid and B cell lineage marker gene expression is normal in *zap70<sup>y442</sup>* mutants.

**Supplementary Figure 5** - Selected GO terms and pathways from GSEAsig analysis of *zap70<sup>y443</sup>* downregulated genes.

**Sup Table 1** - Genes downregulated in *zap70<sup>y442</sup>* mutants

**Sup Table 2** - GSEA signatures for *zap70<sup>y442</sup>* downregulated genes

**Sup Table 3** - GO term List for *zap70<sup>y442</sup>* downregulated genes

**Sup Table 4** - PCR primers

Supplementary Figure 1.

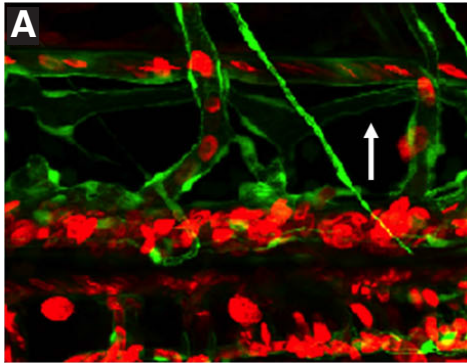

SUP. FIG. 1. *Tg(fli1a:egfp)<sup>y1</sup>*, *Tg(gata1:dsred)<sup>sd2</sup>* transgenic, *zap70<sup>y442</sup>* homozygous mutant zebrafish have normal vascular and lymphatic development. A) Merged confocal image of representative animal shown at 5 dpf (n>6 fish analyzed). Thoracic duct denoted by arrow.

Supplementary Figure 2.

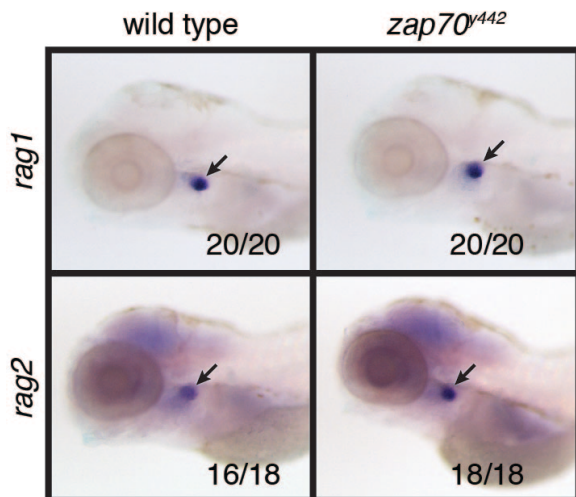

SUP. FIG. 2. - *rag1* and *rag2* are expressed in lymphocyte progenitors of *zap70<sup>y442</sup>* mutants at 5 dpf. Images of whole mount *in situ* hybridization showing expression levels of *rag1* and *rag2* in the thymus (arrows) of wild type and *zap70<sup>y442</sup>* mutant zebrafish at 5 dpf.

Supplementary Figure 3.

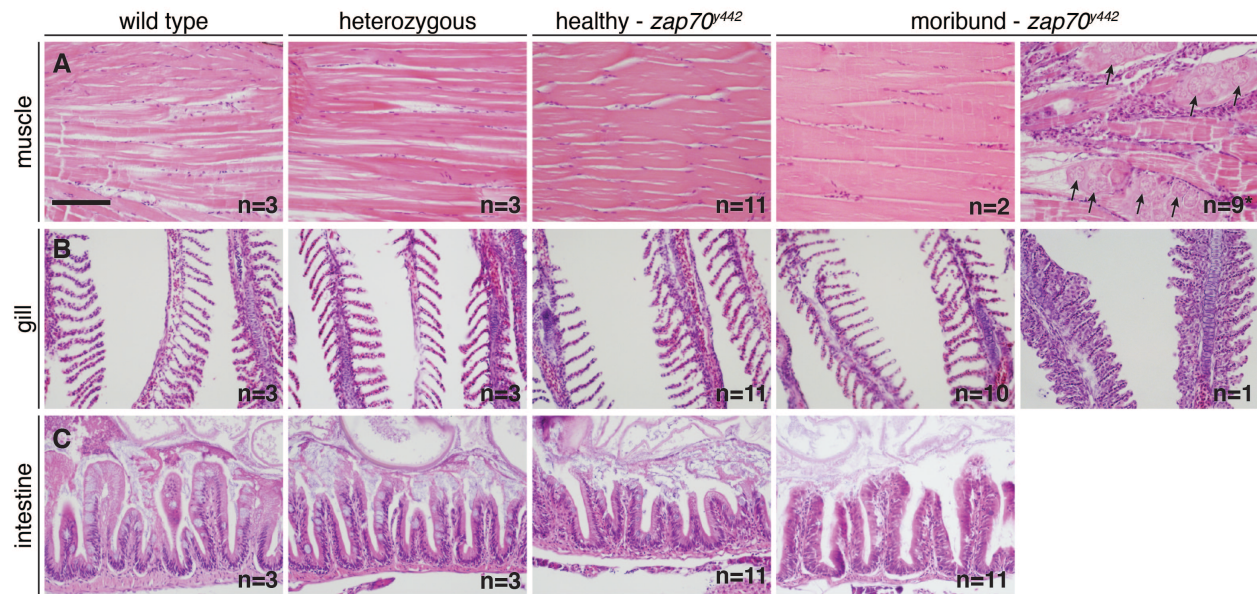

SUP. FIG. 3. Moribund homozygous *zap70*<sup>y442</sup> mutants develop opportunistic infections. (A-C) Hematoxylin and eosin stained sections of 5-7 month old zebrafish, muscle (A), gills (B), and intestine (C). Genotypes and clinical health of animal at time of sacrifice are indicated. Arrows in right panel A show *Pseudoloma neurophilia* xenomas in moribund *zap70*<sup>y442</sup> mutant muscle. Numbers embedded in each panel indicate the number of fish with the associated phenotype. A total of 11 healthy and 11 moribund homozygous *zap70*<sup>y442</sup> mutant fish were analyzed. Asterisk denotes significant difference in number of healthy and moribund homozygous *zap70*<sup>y442</sup> mutant fish that developed infection (  $p < 0.002$ , Fisher exact test). Scale bar equals 100  $\mu\text{m}$ .

Supplementary Figure 4.

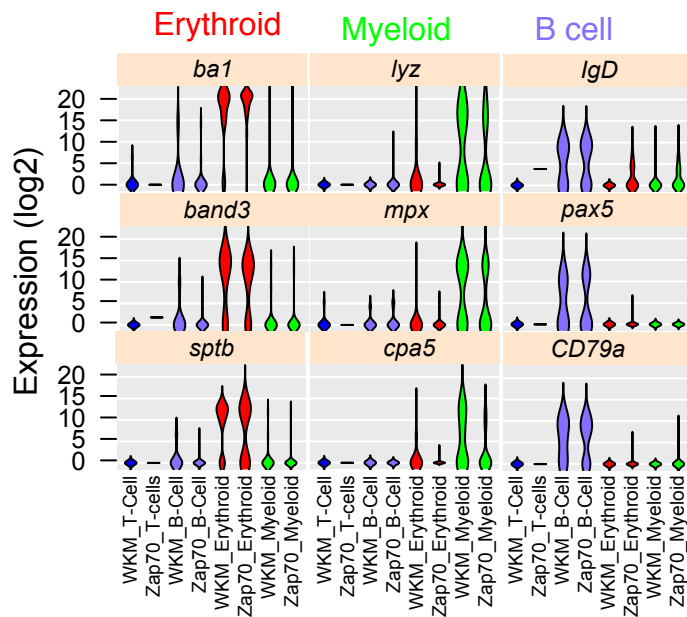

SUP. FIG. 4. Erythroid, myeloid and B cell lineage marker gene expression is normal in *zap70<sup>y442</sup>* mutants. Violin plots show the distribution of gene expression within single whole kidney marrow cells. Cells types were assigned based on hierarchical clustering and assessed for transcript expression of well-known blood cell lineage genes.

Supplementary Figure 5.

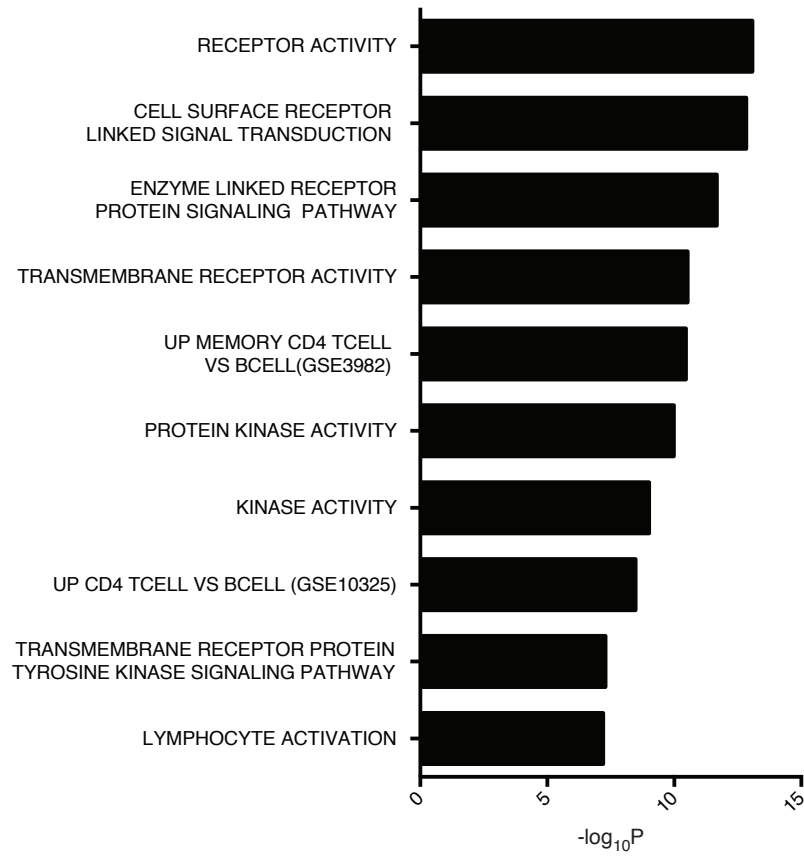

SUP. FIG. 5. Selected GO terms and pathways from GSEAsig analysis of *zap70*<sup>y442</sup> downregulated genes. FDR rate <0.0001 with log<sub>10</sub> p-values noted.

**Supplementary Table 1 - Genes downregulated in zap70<sup>y442</sup> mutants**

| Zap70 <sup>y442</sup> vs wt downregulated genes |                    |                     |        |          |          |          |
|-------------------------------------------------|--------------------|---------------------|--------|----------|----------|----------|
| ZFIN ID                                         | ENSEMBL#           | log <sub>2</sub> FC | logCPM | PValue   | FDR      | Human ID |
| cebp1                                           | ENSDARG00000045240 | -11.10              | 2.86   | 1.34E-23 | 9.13E-21 | CEBPB    |
| mcm3                                            | ENSDARG00000090802 | -10.69              | 4.80   | 4.00E-37 | 7.63E-34 | MCM3     |
| zgc:158260                                      | ENSDARG00000089020 | -10.04              | 1.83   | 3.54E-10 | 4.41E-08 | FAM47E   |
| cox5aa                                          | ENSDARG00000088383 | -9.36               | 1.20   | 1.41E-12 | 2.88E-10 | COX5A    |
| si:ch211-283g2.3                                | ENSDARG00000046092 | -9.02               | 0.89   | 3.10E-09 | 3.08E-07 | ASGR2    |
| larsa                                           | ENSDARG00000089031 | -8.94               | 0.81   | 2.54E-10 | 3.28E-08 | lars     |
| prpf4                                           | ENSDARG00000076717 | -8.66               | 0.57   | 5.06E-09 | 4.76E-07 | PRPF4    |
| ggact.2                                         | ENSDARG00000038248 | -8.64               | 2.81   | 1.09E-04 | 2.05E-03 | GGACT    |
| il34                                            | ENSDARG00000091003 | -8.60               | 0.51   | 1.03E-06 | 4.63E-05 | IL20     |
| narf                                            | ENSDARG00000024184 | -8.44               | 3.42   | 6.40E-26 | 5.31E-23 | NARF     |
| fasn                                            | ENSDARG00000087657 | -8.38               | 3.32   | 1.21E-16 | 4.73E-14 | FASN     |
| cbln9                                           | ENSDARG00000030254 | -8.34               | 2.43   | 1.05E-05 | 3.17E-04 | cbln9    |
| rtn3                                            | ENSDARG00000058028 | -8.26               | 3.81   | 1.77E-06 | 7.26E-05 | RTN3     |
| btr07                                           | ENSDARG00000094877 | -8.22               | 0.18   | 3.53E-05 | 8.51E-04 | btr07    |
| irgq2                                           | ENSDARG00000068657 | -7.87               | -0.12  | 1.64E-06 | 6.84E-05 | irgq2    |
| ft28l                                           | ENSDARG00000088280 | -7.86               | -0.13  | 1.02E-06 | 4.60E-05 | ft28     |
| tas1r3                                          | ENSDARG00000006341 | -7.75               | -0.22  | 4.49E-05 | 1.04E-03 | TAS1R3   |
| rfesd                                           | ENSDARG00000058725 | -7.75               | 3.90   | 9.82E-20 | 5.21E-17 | RFESD    |
| chr3a                                           | ENSDARG00000071091 | -7.50               | -0.43  | 2.19E-05 | 5.77E-04 | CHRM3    |
| bfb                                             | ENSDARG00000005616 | -7.48               | -0.45  | 6.68E-05 | 1.40E-03 | CFB      |
| rab14                                           | ENSDARG00000045261 | -7.38               | 4.27   | 9.37E-33 | 1.37E-29 | RAB14    |
| rrm2                                            | ENSDARG00000020711 | -7.37               | 4.89   | 1.70E-23 | 1.12E-20 | RRM2     |
| kcnh5a                                          | ENSDARG00000043220 | -7.34               | 1.52   | 8.91E-13 | 1.91E-10 | KCNH5    |
| syt9a                                           | ENSDARG00000003994 | -7.33               | -0.56  | 3.11E-04 | 4.57E-03 | SYT9     |
| pparab                                          | ENSDARG00000091024 | -7.26               | -0.62  | 1.14E-04 | 2.12E-03 | PPARA    |
| unc45b                                          | ENSDARG00000008433 | -6.97               | 1.27   | 7.05E-06 | 2.31E-04 | UNC45B   |
| ttc25                                           | ENSDARG00000090531 | -6.89               | -0.91  | 1.44E-04 | 2.57E-03 | TTC25    |
| gzmk                                            | ENSDARG00000090380 | -6.87               | 1.09   | 3.36E-10 | 4.21E-08 | GZMK     |
| sarm1                                           | ENSDARG00000010610 | -6.86               | 4.43   | 1.98E-34 | 3.15E-31 | SARM1    |
| dnajb12b                                        | ENSDARG00000008312 | -6.82               | -0.96  | 4.79E-04 | 6.36E-03 | dnajb12  |
| grid1b                                          | ENSDARG00000044161 | -6.75               | -1.02  | 1.58E-03 | 1.55E-02 | GRID1    |
| CCDC57                                          | ENSDARG00000089863 | -6.71               | 1.72   | 8.47E-13 | 1.84E-10 | CCDC57   |
| cnp                                             | ENSDARG00000091351 | -6.70               | 5.76   | 6.27E-13 | 1.38E-10 | CNP      |
| ribc1                                           | ENSDARG00000055739 | -6.66               | 0.96   | 2.45E-08 | 1.90E-06 | RIBC1    |
| ankef1b                                         | ENSDARG00000060211 | -6.52               | -1.20  | 4.71E-04 | 6.28E-03 | ANKEF1   |
| slc35b1                                         | ENSDARG00000038213 | -6.50               | 0.81   | 4.71E-09 | 4.50E-07 | SLC35B1  |
| foxp3a                                          | ENSDARG00000055750 | -6.36               | 0.66   | 6.80E-08 | 4.55E-06 | FOXP3    |
| si:ch211-161n3.3                                | ENSDARG00000092989 | -6.35               | 0.61   | 1.87E-07 | 1.06E-05 | DMBT1    |
| TP53I3                                          | ENSDARG00000078084 | -6.27               | 0.54   | 9.70E-08 | 6.26E-06 | TP53I3   |
| pkhd11l                                         | ENSDARG00000091116 | -5.90               | 3.62   | 3.39E-11 | 5.58E-09 | PKHD1L1  |
| cryba4                                          | ENSDARG00000024548 | -5.86               | 0.16   | 1.14E-04 | 2.12E-03 | CRYBA4   |
| chrnb1l                                         | ENSDARG00000022532 | -5.81               | 3.06   | 1.83E-06 | 7.46E-05 | CHRN1L1  |
| tas1r2.1                                        | ENSDARG00000053135 | -5.70               | 0.04   | 1.35E-05 | 3.90E-04 | TAS1R2   |
| ccr7                                            | ENSDARG00000044561 | -5.63               | 2.74   | 2.85E-15 | 8.76E-13 | CCR7     |

|                   |                    |       |       |          |          |          |
|-------------------|--------------------|-------|-------|----------|----------|----------|
| SRRM4             | ENSDARG00000096920 | -5.57 | 0.03  | 1.03E-04 | 1.96E-03 | SRRM4    |
| stc2b             | ENSDARG00000089134 | -5.51 | -0.12 | 2.88E-05 | 7.20E-04 | stc2     |
| lrp2b             | ENSDARG00000007906 | -5.49 | 1.19  | 4.98E-06 | 1.76E-04 | lrp2     |
| sc:d217           | ENSDARG00000079645 | -5.48 | 3.20  | 6.54E-05 | 1.38E-03 | sc:d217  |
| pacsin1a          | ENSDARG00000032865 | -5.45 | -0.17 | 7.18E-05 | 1.48E-03 | pacsin1  |
| si:ch211-152c2.3  | ENSDARG00000045898 | -5.45 | 1.18  | 1.23E-06 | 5.34E-05 | ncRNA    |
| rbm22             | ENSDARG00000087678 | -5.44 | 1.73  | 3.83E-11 | 6.09E-09 | RBM22    |
| nsmfa             | ENSDARG00000060025 | -5.44 | -0.14 | 5.53E-06 | 1.91E-04 | NSMF     |
| fam169aa          | ENSDARG00000059719 | -5.40 | -0.21 | 1.10E-05 | 3.28E-04 | FAM169A  |
| myo5b             | ENSDARG00000093553 | -5.33 | 0.59  | 1.21E-05 | 3.57E-04 | MYO5B    |
| si:dkey-147f3.4   | ENSDARG00000071029 | -5.25 | 2.90  | 9.25E-17 | 3.76E-14 | FBXO6    |
| ptprua            | ENSDARG00000092638 | -5.21 | 4.07  | 1.83E-12 | 3.64E-10 | PTPRU    |
| si:ch211-197g15.6 | ENSDARG00000094747 | -5.15 | 0.43  | 5.03E-06 | 1.77E-04 | IFI44    |
| xylb              | ENSDARG00000043260 | -5.12 | 1.35  | 6.11E-09 | 5.58E-07 | XYLB     |
| tfr1b             | ENSDARG00000077372 | -5.11 | 6.32  | 2.45E-29 | 2.60E-26 | TFRC     |
| ntrk3a            | ENSDARG00000077228 | -5.11 | 0.26  | 2.91E-06 | 1.11E-04 | NTRK3    |
| col5a2b           | ENSDARG00000024847 | -5.05 | 0.23  | 4.25E-03 | 3.18E-02 | COL5A2   |
| eomesb            | ENSDARG00000019428 | -5.05 | -0.50 | 1.16E-04 | 2.15E-03 | EOMES    |
| ccdc80l1          | ENSDARG00000030975 | -5.03 | 2.64  | 2.28E-08 | 1.78E-06 | CCDC80   |
| GP5               | ENSDARG00000062303 | -4.99 | 0.74  | 2.13E-06 | 8.52E-05 | GP5      |
| emp1              | ENSDARG00000069632 | -4.97 | 2.36  | 1.67E-09 | 1.75E-07 | EMP1     |
| cd8a              | ENSDARG00000044797 | -4.86 | 0.50  | 1.17E-06 | 5.15E-05 | CD8A     |
| myo3a             | ENSDARG00000010186 | -4.85 | 3.36  | 4.48E-10 | 5.44E-08 | MYO3A    |
| cx27.5            | ENSDARG00000035553 | -4.80 | -0.01 | 5.27E-05 | 1.16E-03 | GJB1     |
| pcloa             | ENSDARG00000063299 | -4.78 | -0.71 | 2.09E-04 | 3.39E-03 | PCLO     |
| slc1a5            | ENSDARG00000090706 | -4.77 | 1.12  | 1.65E-05 | 4.57E-04 | SLC1A4   |
| men1              | ENSDARG00000058021 | -4.76 | 2.93  | 1.51E-05 | 4.27E-04 | MEN1     |
| ugt5a4            | ENSDARG00000097397 | -4.69 | -0.78 | 8.95E-04 | 1.01E-02 | ugt5a4   |
| mapre3b           | ENSDARG00000012330 | -4.68 | -0.74 | 2.91E-04 | 4.34E-03 | MAPRE3   |
| prf1.1            | ENSDARG00000030394 | -4.62 | 0.41  | 9.55E-06 | 2.96E-04 | PRF1     |
| b4galt5           | ENSDARG00000037815 | -4.57 | 1.97  | 5.53E-11 | 8.30E-09 | B4GALT5  |
| zbtb20            | ENSDARG00000005586 | -4.52 | 3.80  | 7.35E-19 | 3.69E-16 | ZBTB20   |
| serpind1          | ENSDARG00000021208 | -4.49 | 5.02  | 3.10E-18 | 1.41E-15 | SERPIND1 |
| kcnq3             | ENSDARG00000060085 | -4.47 | -0.90 | 7.18E-04 | 8.63E-03 | KCNQ3    |
| nradd             | ENSDARG00000057143 | -4.46 | 0.16  | 1.28E-05 | 3.76E-04 | NGFR     |
| pdia2             | ENSDARG00000018263 | -4.45 | 5.99  | 7.58E-14 | 1.81E-11 | pdia2    |
| gfra3             | ENSDARG00000087704 | -4.41 | -0.92 | 1.26E-03 | 1.32E-02 | gfra3    |
| gabbr2            | ENSDARG00000061042 | -4.40 | 0.17  | 2.45E-05 | 6.32E-04 | GABBR2   |
| themis            | ENSDARG00000010619 | -4.33 | 2.03  | 3.65E-09 | 3.57E-07 | THEMIS   |
| si:ch211-197g15.6 | ENSDARG00000009673 | -4.31 | 0.72  | 1.18E-06 | 5.17E-05 | IFI44    |
| abhd8a            | ENSDARG00000079719 | -4.26 | -0.41 | 1.61E-04 | 2.79E-03 | ABHD8    |
| zbtb16a           | ENSDARG00000007184 | -4.24 | 4.71  | 1.03E-14 | 2.64E-12 | ZBTB16   |
| zap70             | ENSDARG00000015752 | -4.16 | 2.68  | 1.11E-08 | 9.34E-07 | ZAP70    |
| scn4bb            | ENSDARG00000060319 | -4.14 | -0.54 | 3.13E-04 | 4.59E-03 | SCN4B    |
| prg4a             | ENSDARG00000010482 | -4.12 | 3.15  | 9.74E-10 | 1.08E-07 | PRG4     |
| rgs8              | ENSDARG00000070037 | -4.08 | -0.06 | 1.94E-03 | 1.80E-02 | RGS8     |
| elfn1b            | ENSDARG00000074372 | -4.07 | -0.62 | 6.64E-03 | 4.38E-02 | ELFN1    |
| itga10            | ENSDARG00000002507 | -4.06 | 0.31  | 1.26E-04 | 2.29E-03 | ITGA10   |
| galnt18a          | ENSDARG00000030292 | -4.06 | 0.20  | 7.36E-05 | 1.51E-03 | GALNT18  |

|                 |                    |       |       |          |          |          |
|-----------------|--------------------|-------|-------|----------|----------|----------|
| SPOCK1          | ENSDARG00000074644 | -4.04 | -0.62 | 5.25E-04 | 6.78E-03 | SPOCK1   |
| gbgt1l3         | ENSDARG00000035555 | -3.99 | 1.57  | 2.47E-04 | 3.88E-03 | GBGT1    |
| cfhl5           | ENSDARG00000092786 | -3.98 | -0.59 | 8.96E-04 | 1.01E-02 | cfhl5    |
| mlnl            | ENSDARG00000092916 | -3.91 | 0.99  | 1.14E-04 | 2.11E-03 | mlnl     |
| b4galnt4a       | ENSDARG00000046150 | -3.91 | 0.72  | 7.07E-06 | 2.32E-04 | B4GALNT4 |
| crispld1a       | ENSDARG00000077275 | -3.87 | 1.05  | 1.46E-06 | 6.15E-05 | CRISPLD1 |
| ctrl            | ENSDARG00000068680 | -3.84 | 1.75  | 1.71E-04 | 2.92E-03 | CTRL     |
| lingo4a         | ENSDARG00000094908 | -3.82 | -0.75 | 1.28E-03 | 1.32E-02 | lingo4   |
| ttna            | ENSDARG00000028213 | -3.81 | 3.82  | 1.18E-03 | 1.25E-02 | TTN      |
| kif17           | ENSDARG00000055238 | -3.81 | 1.08  | 5.43E-06 | 1.89E-04 | KIF17    |
| crb2b           | ENSDARG00000060081 | -3.79 | 2.45  | 7.50E-09 | 6.65E-07 | CRB2     |
| ntng2a          | ENSDARG00000077367 | -3.79 | 0.70  | 1.48E-05 | 4.20E-04 | NTNG2    |
| pde8b           | ENSDARG00000063706 | -3.78 | 4.65  | 9.25E-08 | 6.09E-06 | PDE8B    |
| RAB27B          | ENSDARG00000087762 | -3.76 | -0.30 | 5.09E-04 | 6.63E-03 | RAB27B   |
| adam11          | ENSDARG00000079204 | -3.69 | 1.41  | 4.20E-07 | 2.15E-05 | ADAM11   |
| abi1b           | ENSDARG00000062991 | -3.69 | 2.51  | 4.84E-08 | 3.42E-06 | ABI1     |
| si:dkey-147f3.4 | ENSDARG00000092077 | -3.67 | 1.85  | 5.05E-08 | 3.53E-06 | FBXO6    |
| neb             | ENSDARG00000032630 | -3.66 | 3.00  | 4.78E-03 | 3.45E-02 | NEB      |
| gdpd4a          | ENSDARG00000078196 | -3.65 | -0.52 | 1.47E-03 | 1.48E-02 | GDPD5    |
| csde1           | ENSDARG00000062157 | -3.64 | 5.89  | 1.19E-05 | 3.52E-04 | CSDE1    |
| abhd2a          | ENSDARG00000025797 | -3.64 | 4.20  | 3.27E-15 | 9.86E-13 | ABHD2    |
| sult2st3        | ENSDARG00000028367 | -3.63 | 4.50  | 1.16E-10 | 1.64E-08 | SULT2B1  |
| RAI1            | ENSDARG00000076679 | -3.63 | -0.94 | 4.63E-03 | 3.37E-02 | rai1     |
| pabpc4          | ENSDARG00000059259 | -3.62 | 2.03  | 3.19E-05 | 7.86E-04 | PABPC4   |
| tcf7            | ENSDARG00000038672 | -3.61 | 2.09  | 2.68E-08 | 2.06E-06 | TCF7     |
| adpgk2          | ENSDARG00000062785 | -3.60 | 4.05  | 3.89E-10 | 4.82E-08 | ADPGK    |
| apoeb           | ENSDARG00000040295 | -3.58 | 3.94  | 5.63E-09 | 5.24E-07 | APOE     |
| myhz1.1         | ENSDARG00000067990 | -3.57 | 0.49  | 1.18E-03 | 1.25E-02 | MYH1     |
| eps8l1          | ENSDARG00000057984 | -3.56 | 1.41  | 2.20E-07 | 1.21E-05 | eps8l1   |
| ctnnd2a         | ENSDARG00000062415 | -3.55 | 1.15  | 1.19E-03 | 1.25E-02 | CTNND2   |
| cyp2aa6         | ENSDARG00000088744 | -3.52 | 3.96  | 5.93E-13 | 1.33E-10 | cyp2aa6  |
| upk1a           | ENSDARG00000021866 | -3.51 | -0.52 | 7.84E-04 | 9.16E-03 | UPK1A    |
| gucy2f          | ENSDARG00000025504 | -3.50 | 0.02  | 1.60E-04 | 2.78E-03 | GUCY2F   |
| snx6            | ENSDARG00000058444 | -3.48 | 4.56  | 5.31E-15 | 1.49E-12 | SNX6     |
| npc1l1          | ENSDARG00000077891 | -3.47 | -0.06 | 3.02E-04 | 4.46E-03 | NPC1L1   |
| wnt9b           | ENSDARG00000037889 | -3.44 | 1.59  | 1.23E-06 | 5.34E-05 | WNT9B    |
| neu3.2          | ENSDARG00000010047 | -3.43 | 0.38  | 2.68E-04 | 4.13E-03 | NEU3     |
| SDSL            | ENSDARG00000074698 | -3.42 | 5.03  | 1.34E-11 | 2.33E-09 | SDSL     |
| slc27a2b        | ENSDARG00000013177 | -3.41 | 9.28  | 9.01E-06 | 2.81E-04 | SLC27A2  |
| tmtpsb          | ENSDARG00000032246 | -3.40 | 3.05  | 2.15E-08 | 1.68E-06 | tmtpsb   |
| slc18a3a        | ENSDARG00000006356 | -3.40 | 1.51  | 1.08E-05 | 3.26E-04 | SLC18A3  |
| ptrfa           | ENSDARG00000076411 | -3.40 | -0.70 | 2.62E-03 | 2.25E-02 | PTRF     |
| nos1            | ENSDARG00000068910 | -3.38 | 1.42  | 2.71E-06 | 1.05E-04 | NOS1     |
| gpx3            | ENSDARG00000043342 | -3.37 | 1.32  | 1.06E-06 | 4.76E-05 | GPX3     |
| dvl1b           | ENSDARG00000055552 | -3.36 | 0.15  | 7.32E-04 | 8.71E-03 | DVL1     |
| ccdc125         | ENSDARG00000056477 | -3.36 | 2.47  | 1.61E-06 | 6.73E-05 | CCDC125  |
| igfn1.1         | ENSDARG00000005526 | -3.35 | 2.69  | 4.31E-04 | 5.88E-03 | IGFN1    |
| ppm1f           | ENSDARG00000005786 | -3.34 | 0.28  | 1.79E-04 | 3.02E-03 | PPM1F    |
| ASCC1           | ENSDARG00000037617 | -3.33 | 1.37  | 2.03E-06 | 8.16E-05 | ASCC1    |



|            |                    |       |       |          |          |         |
|------------|--------------------|-------|-------|----------|----------|---------|
| cthr1b     | ENSDARG0000001971  | -3.32 | 0.27  | 2.16E-04 | 3.49E-03 | CTHRC1  |
| qkia       | ENSDARG00000044462 | -3.32 | 1.02  | 2.56E-04 | 3.98E-03 | QKI     |
| ddx6       | ENSDARG00000061338 | -3.32 | 4.41  | 7.22E-12 | 1.30E-09 | DDX6    |
| ndst2a     | ENSDARG00000060678 | -3.29 | 5.45  | 6.61E-10 | 7.69E-08 | NDST2   |
| pigt       | ENSDARG00000075842 | -3.27 | 2.23  | 6.58E-08 | 4.44E-06 | PIGT    |
| pdlim7     | ENSDARG00000030638 | -3.27 | 0.86  | 6.53E-04 | 8.01E-03 | PDLIM7  |
| ocstamp    | ENSDARG00000022139 | -3.27 | 0.36  | 2.02E-04 | 3.29E-03 | OCSTAMP |
| mboat2a    | ENSDARG00000031845 | -3.23 | 3.15  | 2.41E-09 | 2.46E-07 | MBOAT2  |
| rbm45      | ENSDARG00000063731 | -3.21 | 2.13  | 1.71E-07 | 9.76E-06 | RBM45   |
| cyp1b1     | ENSDARG00000068934 | -3.21 | 4.11  | 1.72E-10 | 2.23E-08 | CYP1B1  |
| atp8a1     | ENSDARG00000063001 | -3.19 | 1.21  | 2.07E-05 | 5.57E-04 | atp8a1  |
| fat3a      | ENSDARG00000033840 | -3.19 | 2.25  | 2.25E-07 | 1.23E-05 | fat3    |
| osmr       | ENSDARG00000042903 | -3.16 | 4.53  | 6.71E-10 | 7.76E-08 | OSMR    |
| p2rx1      | ENSDARG00000016695 | -3.16 | 2.13  | 5.38E-07 | 2.65E-05 | P2RX1   |
| LIN28B     | ENSDARG00000052511 | -3.16 | -0.52 | 1.97E-03 | 1.82E-02 | LIN28B  |
| ppp1r32    | ENSDARG00000089183 | -3.16 | 2.20  | 2.49E-04 | 3.90E-03 | PPP1R32 |
| PKD1       | ENSDARG00000030417 | -3.15 | 3.36  | 6.11E-09 | 5.58E-07 | PKD1    |
| zgc:101810 | ENSDARG00000004658 | -3.13 | -0.27 | 1.66E-03 | 1.60E-02 | ACTR2   |
| cel.2      | ENSDARG00000029822 | -3.10 | 1.01  | 4.04E-04 | 5.57E-03 | CEL     |
| jarid2b    | ENSDARG00000062268 | -3.10 | 4.06  | 1.69E-10 | 2.21E-08 | JARID2  |
| ptprdb     | ENSDARG00000019945 | -3.10 | 2.09  | 6.52E-06 | 2.19E-04 | PTPRD   |
| znf536     | ENSDARG00000022251 | -3.08 | 1.02  | 4.10E-04 | 5.63E-03 | ZNF536  |
| cacng6b    | ENSDARG00000046079 | -3.07 | 0.43  | 3.91E-04 | 5.41E-03 | CACNG6  |
| mitfb      | ENSDARG00000037833 | -3.07 | 1.33  | 1.59E-04 | 2.77E-03 | MITF    |
| cd40lg     | ENSDARG00000079333 | -3.07 | -0.06 | 1.23E-03 | 1.29E-02 | cd40lg  |
| itk        | ENSDARG00000017565 | -3.05 | 2.55  | 1.53E-07 | 9.00E-06 | ITK     |
| nefma      | ENSDARG00000021351 | -3.05 | 0.15  | 1.27E-03 | 1.32E-02 | NEFM    |
| crebrf     | ENSDARG00000078581 | -3.05 | 3.01  | 1.67E-07 | 9.61E-06 | CREBRF  |
| trim35-36  | ENSDARG00000032169 | -3.04 | 1.53  | 5.76E-04 | 7.31E-03 | trim35  |
| greb1l     | ENSDARG00000039196 | -3.02 | 5.24  | 1.61E-07 | 9.39E-06 | GREB1L  |
| kdr        | ENSDARG00000017321 | -3.02 | 6.50  | 1.72E-13 | 4.01E-11 | KDR     |
| hdac5      | ENSDARG00000075139 | -3.02 | 4.67  | 3.81E-08 | 2.80E-06 | HDAC5   |
| abca12     | ENSDARG00000074749 | -3.01 | 1.61  | 1.02E-04 | 1.94E-03 | ABCA12  |
| ATXN1L     | ENSDARG00000086977 | -2.98 | 1.79  | 5.09E-06 | 1.79E-04 | ATXN1L  |
| mst1rb     | ENSDARG00000004871 | -2.98 | 4.93  | 9.18E-07 | 4.16E-05 | MST1R   |
| osbpl6     | ENSDARG00000063730 | -2.97 | 2.04  | 1.80E-06 | 7.34E-05 | OSBPL6  |
| gfra1b     | ENSDARG00000013975 | -2.96 | 0.61  | 9.52E-04 | 1.06E-02 | GFRA1   |
| hspb6      | ENSDARG00000077236 | -2.94 | 3.93  | 5.98E-05 | 1.28E-03 | HSPB6   |
| GPR52      | ENSDARG00000093460 | -2.93 | 2.24  | 8.20E-07 | 3.79E-05 | GPR52   |
| hmbx1a     | ENSDARG00000027082 | -2.89 | 0.63  | 1.02E-03 | 1.12E-02 | HMBX1   |
| phkg1a     | ENSDARG00000030604 | -2.89 | 2.55  | 8.53E-06 | 2.69E-04 | PHKG1   |
| cpa1       | ENSDARG00000030915 | -2.88 | -0.22 | 4.41E-03 | 3.27E-02 | CPA1    |
| tnnt1      | ENSDARG00000037954 | -2.88 | 1.27  | 4.65E-03 | 3.38E-02 | TNNT2   |
| klf7a      | ENSDARG00000073857 | -2.87 | -0.09 | 2.16E-03 | 1.93E-02 | KLF7    |
| dennd1b    | ENSDARG00000029374 | -2.86 | 2.27  | 3.55E-06 | 1.32E-04 | DENND1B |
| slc6a6a    | ENSDARG00000012534 | -2.85 | 9.45  | 6.42E-06 | 2.16E-04 | SLC6A6  |
| opa1       | ENSDARG00000044329 | -2.84 | 2.96  | 2.45E-04 | 3.85E-03 | OPA1    |
| dlgap3     | ENSDARG00000055459 | -2.83 | 0.25  | 7.00E-04 | 8.50E-03 | DLGAP3  |
| cel.1      | ENSDARG00000017490 | -2.82 | 1.63  | 1.75E-04 | 2.97E-03 | CEL     |

|                  |                    |       |      |          |          |          |
|------------------|--------------------|-------|------|----------|----------|----------|
| fam101a          | ENSDARG00000023484 | -2.81 | 4.36 | 1.80E-09 | 1.85E-07 | FAM101A  |
| FBLN7            | ENSDARG00000089519 | -2.81 | 0.43 | 5.53E-03 | 3.81E-02 | FBLN7    |
| dnah9            | ENSDARG00000097705 | -2.79 | 1.63 | 1.77E-04 | 3.00E-03 | DNAH9    |
| grb10b           | ENSDARG00000035308 | -2.76 | 4.08 | 1.13E-08 | 9.43E-07 | GRB10    |
| grm6b            | ENSDARG00000025671 | -2.74 | 1.27 | 2.42E-03 | 2.12E-02 | GRM6     |
| celsr1b          | ENSDARG00000058259 | -2.74 | 2.82 | 5.71E-05 | 1.24E-03 | CELSR1   |
| si:dkeyp-75b4.10 | ENSDARG00000079043 | -2.72 | 8.16 | 1.26E-08 | 1.03E-06 | REG1B    |
| ptges3b          | ENSDARG00000089626 | -2.71 | 1.97 | 2.74E-04 | 4.18E-03 | PTGES3   |
| mkl2a            | ENSDARG00000088307 | -2.70 | 2.15 | 5.15E-05 | 1.15E-03 | MKL2     |
| mical2a          | ENSDARG00000075608 | -2.70 | 3.06 | 3.06E-07 | 1.61E-05 | MICAL2   |
| map2             | ENSDARG00000055052 | -2.69 | 3.04 | 1.47E-05 | 4.18E-04 | MAP2     |
| cacna1aa         | ENSDARG00000037905 | -2.68 | 1.45 | 4.68E-04 | 6.25E-03 | CACNA1A  |
| try              | ENSDARG00000042993 | -2.67 | 2.91 | 1.22E-03 | 1.28E-02 | PRSS1    |
| rora             | ENSDARG00000031768 | -2.67 | 2.96 | 8.81E-07 | 4.01E-05 | RORA     |
| cdr2a            | ENSDARG00000035952 | -2.67 | 1.63 | 3.30E-04 | 4.77E-03 | CDR2     |
| fgfr3            | ENSDARG00000004782 | -2.66 | 0.42 | 1.68E-03 | 1.62E-02 | FGFR3    |
| ptprq            | ENSDARG00000008849 | -2.66 | 3.53 | 1.72E-08 | 1.37E-06 | PTPRQ    |
| nav3             | ENSDARG00000005476 | -2.66 | 6.77 | 1.29E-09 | 1.38E-07 | NAV3     |
| rab44            | ENSDARG00000028389 | -2.66 | 6.71 | 1.03E-10 | 1.47E-08 | rab44    |
| phlda1           | ENSDARG00000039714 | -2.65 | 3.11 | 2.36E-06 | 9.36E-05 | PHLDA1   |
| bend5            | ENSDARG00000075624 | -2.63 | 2.09 | 6.97E-06 | 2.30E-04 | BEND5    |
| lcor             | ENSDARG00000070907 | -2.63 | 0.81 | 3.13E-04 | 4.58E-03 | LCOR     |
| xylt1            | ENSDARG00000061248 | -2.62 | 3.81 | 4.64E-07 | 2.34E-05 | XYLT1    |
| colq             | ENSDARG00000019692 | -2.62 | 4.10 | 3.14E-07 | 1.64E-05 | colq     |
| prkceb           | ENSDARG00000069928 | -2.62 | 0.99 | 5.68E-04 | 7.25E-03 | PRKCE    |
| dscamb           | ENSDARG00000028118 | -2.60 | 3.61 | 5.17E-05 | 1.15E-03 | DSCAM    |
| AGO1             | ENSDARG00000092644 | -2.59 | 2.03 | 1.22E-04 | 2.23E-03 | AGO1     |
| sla2             | ENSDARG00000020788 | -2.59 | 2.28 | 1.92E-05 | 5.21E-04 | SLA2     |
| tenm1            | ENSDARG00000003403 | -2.59 | 0.28 | 1.51E-03 | 1.50E-02 | TENM1    |
| slc23a2          | ENSDARG00000017365 | -2.58 | 2.32 | 1.01E-05 | 3.09E-04 | SLC23A2  |
| sh3gl3a          | ENSDARG00000013360 | -2.58 | 1.38 | 9.71E-05 | 1.88E-03 | SH3GL3   |
| si:dkeyp-71b5.7  | ENSDARG00000080675 | -2.56 | 2.25 | 2.11E-05 | 5.63E-04 | OTOA     |
| il2rb            | ENSDARG00000075720 | -2.55 | 4.35 | 4.52E-07 | 2.28E-05 | IL2RB    |
| dgkh             | ENSDARG00000018716 | -2.54 | 4.69 | 7.88E-06 | 2.52E-04 | DGKH     |
| nkiras2          | ENSDARG00000089585 | -2.53 | 2.33 | 4.88E-03 | 3.51E-02 | NKIRAS2  |
| lrrc58a          | ENSDARG00000076773 | -2.52 | 2.95 | 7.25E-04 | 8.65E-03 | LRRC58   |
| TPPP2            | ENSDARG00000035338 | -2.52 | 0.46 | 5.54E-03 | 3.82E-02 | TPPP3    |
| mia2             | ENSDARG00000078023 | -2.51 | 1.56 | 3.87E-04 | 5.38E-03 | MIA2     |
| zbtb34           | ENSDARG00000013492 | -2.50 | 2.07 | 1.61E-05 | 4.51E-04 | ZBTB34   |
| cd4              | ENSDARG00000070668 | -2.50 | 1.90 | 8.03E-04 | 9.30E-03 | cd4      |
| LRP3             | ENSDARG00000008485 | -2.50 | 2.63 | 1.26E-03 | 1.32E-02 | LRP3     |
| col4a3           | ENSDARG00000003395 | -2.49 | 3.71 | 1.53E-07 | 9.00E-06 | COL4A5   |
| atf2             | ENSDARG00000023903 | -2.49 | 0.74 | 8.72E-04 | 9.93E-03 | ATF2     |
| atp10a           | ENSDARG00000061039 | -2.49 | 2.81 | 2.17E-05 | 5.73E-04 | ATP10A   |
| notch1b          | ENSDARG00000052094 | -2.48 | 5.93 | 6.40E-10 | 7.54E-08 | NOTCH1   |
| scamp5a          | ENSDARG00000018743 | -2.48 | 1.12 | 7.80E-04 | 9.15E-03 | SCAMP5   |
| aatka            | ENSDARG00000078222 | -2.48 | 6.26 | 2.36E-07 | 1.28E-05 | AATK     |
| slc6a8           | ENSDARG00000043646 | -2.47 | 4.42 | 8.91E-06 | 2.79E-04 | SLC6A8   |
| si:ch211-207d6.2 | ENSDARG00000031658 | -2.47 | 1.68 | 1.33E-04 | 2.41E-03 | KIAA1217 |

|          |                    |       |      |          |          |         |
|----------|--------------------|-------|------|----------|----------|---------|
| SIPA1    | ENSDARG00000076697 | -2.46 | 3.85 | 2.74E-08 | 2.10E-06 | SIPA1L2 |
| rorca    | ENSDARG00000057231 | -2.45 | 4.80 | 7.86E-09 | 6.91E-07 | rorc    |
| slc12a2  | ENSDARG00000086870 | -2.45 | 3.13 | 1.06E-05 | 3.20E-04 | SLC12A2 |
| epha4b   | ENSDARG00000011600 | -2.45 | 2.98 | 3.12E-05 | 7.73E-04 | EPHA4   |
| scube3   | ENSDARG00000011490 | -2.45 | 1.88 | 7.71E-05 | 1.56E-03 | SCUBE3  |
| hspa4a   | ENSDARG00000004754 | -2.44 | 7.15 | 9.43E-04 | 1.05E-02 | HSPA4   |
| kif1aa   | ENSDARG00000061817 | -2.44 | 2.63 | 2.64E-05 | 6.72E-04 | KIF1A   |
| PLEKHA6  | ENSDARG00000020328 | -2.41 | 6.47 | 5.68E-07 | 2.78E-05 | PLEKHA6 |
| rab3ab   | ENSDARG00000043835 | -2.41 | 1.54 | 2.00E-04 | 3.27E-03 | RAB3A   |
| camkvl   | ENSDARG00000057000 | -2.41 | 1.37 | 1.62E-03 | 1.58E-02 | ADNP    |
| sall3b   | ENSDARG00000057586 | -2.40 | 0.76 | 1.18E-03 | 1.25E-02 | sall3   |
| rhobtb2a | ENSDARG00000016868 | -2.40 | 3.81 | 2.22E-05 | 5.81E-04 | RHOBTB1 |
| mtf1     | ENSDARG00000090180 | -2.39 | 2.11 | 4.10E-05 | 9.61E-04 | MTF1    |
| map1ab   | ENSDARG00000022045 | -2.37 | 1.83 | 8.91E-04 | 1.01E-02 | MAP1A   |
| TNFSF14  | ENSDARG00000076274 | -2.37 | 0.49 | 3.27E-03 | 2.62E-02 | tnfsf14 |
| pcnxi3   | ENSDARG00000019501 | -2.37 | 4.95 | 2.21E-09 | 2.27E-07 | pcnxi3  |
| ATP8B4   | ENSDARG00000079453 | -2.37 | 4.03 | 1.37E-07 | 8.24E-06 | ATP8B4  |
| crhr1    | ENSDARG00000003989 | -2.37 | 1.01 | 3.77E-03 | 2.92E-02 | CRHR1   |
| crtac1a  | ENSDARG00000059826 | -2.37 | 0.57 | 5.61E-03 | 3.86E-02 | CRTAC1  |
| slco1f1  | ENSDARG00000037605 | -2.36 | 7.80 | 7.42E-04 | 8.79E-03 | slco1f1 |
| vdrb     | ENSDARG00000070721 | -2.36 | 2.18 | 2.51E-04 | 3.92E-03 | VDR     |
| MAP3K2   | ENSDARG00000062884 | -2.36 | 2.99 | 4.87E-06 | 1.73E-04 | MAP3K2  |
| pnoca    | ENSDARG00000025024 | -2.35 | 1.40 | 6.42E-03 | 4.27E-02 | PNOC    |
| KIF21B   | ENSDARG00000009733 | -2.35 | 3.24 | 2.48E-06 | 9.74E-05 | KIF21B  |
| stim2b   | ENSDARG00000001776 | -2.33 | 2.31 | 3.24E-05 | 7.92E-04 | STIM2   |
| il11ra   | ENSDARG00000026736 | -2.33 | 3.17 | 7.04E-06 | 2.31E-04 | IL11RA  |
| nbeal2   | ENSDARG00000057508 | -2.33 | 5.59 | 5.34E-09 | 5.00E-07 | NBEAL2  |
| MCF2L2   | ENSDARG00000079742 | -2.32 | 2.32 | 4.04E-05 | 9.51E-04 | MCF2L2  |
| tnc      | ENSDARG00000021948 | -2.32 | 2.97 | 2.84E-06 | 1.09E-04 | TNC     |
| sptbn2   | ENSDARG00000053956 | -2.32 | 6.56 | 1.24E-07 | 7.56E-06 | SPTBN2  |
| irx3b    | ENSDARG00000031138 | -2.32 | 5.61 | 5.01E-05 | 1.13E-03 | IRX3    |
| ascc1    | ENSDARG00000077760 | -2.32 | 4.32 | 3.07E-06 | 1.16E-04 | ASCC1   |
| eef2a.2  | ENSDARG00000042065 | -2.31 | 2.15 | 8.63E-05 | 1.71E-03 | EEF2    |
| ar       | ENSDARG00000067976 | -2.31 | 6.77 | 6.79E-08 | 4.55E-06 | AR      |
| DNAH9    | ENSDARG00000087112 | -2.30 | 1.68 | 6.44E-04 | 7.93E-03 | DNAH9   |
| itga9    | ENSDARG00000032435 | -2.30 | 0.58 | 3.10E-03 | 2.53E-02 | ITGA9   |
| ppp1r9a  | ENSDARG00000061304 | -2.29 | 2.97 | 7.79E-06 | 2.50E-04 | PPP1R9A |
| ctsbb    | ENSDARG00000067570 | -2.29 | 5.38 | 1.12E-08 | 9.40E-07 | CTSB    |
| col4a4   | ENSDARG00000002831 | -2.28 | 2.85 | 2.70E-05 | 6.83E-04 | COL4A4  |
| hydin    | ENSDARG00000056764 | -2.28 | 5.06 | 1.50E-07 | 8.87E-06 | HYDIN   |
| col27a1b | ENSDARG00000028236 | -2.27 | 1.52 | 2.98E-04 | 4.42E-03 | COL27A1 |
| gatad2b  | ENSDARG00000005834 | -2.27 | 4.16 | 1.29E-08 | 1.05E-06 | GATAD2B |
| msh4     | ENSDARG00000075826 | -2.27 | 1.14 | 3.99E-03 | 3.05E-02 | MSH4    |
| scn4ab   | ENSDARG00000034588 | -2.27 | 4.11 | 1.09E-07 | 6.89E-06 | SCN4A   |
| lamb2    | ENSDARG00000002084 | -2.27 | 4.46 | 4.73E-08 | 3.38E-06 | LAMB2   |
| zmiz2    | ENSDARG00000079812 | -2.26 | 4.85 | 1.61E-07 | 9.39E-06 | ZMIZ2   |
| JADE2    | ENSDARG00000053389 | -2.25 | 3.28 | 3.22E-05 | 7.88E-04 | JADE2   |
| gnao1a   | ENSDARG00000016676 | -2.23 | 4.47 | 1.63E-07 | 9.49E-06 | GNAO1   |
| atp1b1b  | ENSDARG00000076833 | -2.23 | 1.59 | 2.60E-03 | 2.23E-02 | ATP1B1  |

|            |                    |       |      |          |          |          |
|------------|--------------------|-------|------|----------|----------|----------|
| TMEM132E   | ENSDARG00000090830 | -2.23 | 1.78 | 6.71E-04 | 8.21E-03 | TMEM132E |
| fmnl2a     | ENSDARG00000012586 | -2.22 | 3.01 | 1.62E-05 | 4.54E-04 | FMNL2    |
| setbp1     | ENSDARG00000093799 | -2.22 | 3.96 | 6.93E-07 | 3.31E-05 | SETBP1   |
| map2k7     | ENSDARG00000008279 | -2.22 | 2.00 | 1.94E-04 | 3.21E-03 | MAP2K7   |
| plekhf1    | ENSDARG00000027852 | -2.20 | 5.69 | 8.67E-04 | 9.88E-03 | PLEKHF1  |
| igf2bp1    | ENSDARG00000061478 | -2.20 | 3.06 | 2.88E-05 | 7.20E-04 | IGF2BP1  |
| dab1a      | ENSDARG00000059939 | -2.20 | 2.54 | 1.37E-04 | 2.47E-03 | DAB1     |
| slc6a2     | ENSDARG00000016141 | -2.19 | 7.26 | 5.17E-04 | 6.71E-03 | SLC6A2   |
| csad       | ENSDARG00000026348 | -2.19 | 5.99 | 2.35E-04 | 3.72E-03 | CSAD     |
| itgb3b     | ENSDARG00000045070 | -2.18 | 3.15 | 5.29E-05 | 1.17E-03 | ITGB3    |
| trioa      | ENSDARG00000019426 | -2.18 | 4.88 | 9.37E-08 | 6.15E-06 | TRIO     |
| sema3bl    | ENSDARG00000007560 | -2.18 | 2.51 | 1.40E-04 | 2.52E-03 | SEMA3G   |
| vcana      | ENSDARG00000078680 | -2.17 | 0.66 | 6.82E-03 | 4.47E-02 | VCAN     |
| nadl1.2    | ENSDARG00000007149 | -2.16 | 3.86 | 6.44E-04 | 7.93E-03 | L1CAM    |
| MAP1B      | ENSDARG00000060434 | -2.16 | 1.38 | 3.64E-03 | 2.84E-02 | MAP1B    |
| hdac4      | ENSDARG00000041204 | -2.16 | 3.61 | 1.17E-06 | 5.15E-05 | HDAC4    |
| pparab     | ENSDARG00000054323 | -2.16 | 0.53 | 6.75E-03 | 4.43E-02 | PPARA    |
| grin2ab    | ENSDARG00000070543 | -2.16 | 3.31 | 1.23E-03 | 1.29E-02 | GRIN2A   |
| hipk2      | ENSDARG00000042518 | -2.15 | 6.41 | 1.11E-06 | 4.92E-05 | HIPK2    |
| agr        | ENSDARG00000096339 | -2.14 | 1.44 | 1.32E-03 | 1.36E-02 | AGR      |
| zgc:101640 | ENSDARG00000022807 | -2.14 | 7.08 | 9.89E-08 | 6.36E-06 | PITPNC1  |
| fn1b       | ENSDARG00000006526 | -2.14 | 6.23 | 2.87E-04 | 4.32E-03 | FN1      |
| PHKA2      | ENSDARG00000030687 | -2.14 | 3.76 | 5.38E-06 | 1.87E-04 | PHKA2    |
| ryr1b      | ENSDARG00000023797 | -2.14 | 1.86 | 4.52E-03 | 3.33E-02 | RYR2     |
| kalrna     | ENSDARG00000078117 | -2.12 | 2.26 | 7.23E-04 | 8.65E-03 | KALRN    |
| igf1ra     | ENSDARG00000027423 | -2.12 | 3.66 | 1.36E-06 | 5.79E-05 | IGF1R    |
| tpbgb      | ENSDARG00000037186 | -2.12 | 2.60 | 3.38E-04 | 4.85E-03 | TPBG     |
| prss12     | ENSDARG00000061830 | -2.12 | 1.41 | 3.32E-03 | 2.66E-02 | PRSS12   |
| hmcn2      | ENSDARG00000079327 | -2.12 | 1.88 | 2.59E-03 | 2.23E-02 | HMCN2    |
| slc8a1b    | ENSDARG00000043406 | -2.12 | 4.36 | 1.95E-06 | 7.89E-05 | SLC8A1   |
| crim1      | ENSDARG00000029668 | -2.11 | 4.44 | 2.16E-07 | 1.20E-05 | CRIM1    |
| palm2      | ENSDARG00000069608 | -2.11 | 4.47 | 2.44E-07 | 1.31E-05 | PALM2    |
| rasgrp3    | ENSDARG00000077864 | -2.11 | 4.37 | 4.04E-05 | 9.51E-04 | RASGRP3  |
| cnnm4      | ENSDARG00000074309 | -2.11 | 4.49 | 1.02E-07 | 6.52E-06 | CNNM4    |
| gnb1b      | ENSDARG00000005944 | -2.11 | 4.79 | 1.34E-05 | 3.90E-04 | GNB1     |
| atp2b2     | ENSDARG00000063433 | -2.11 | 0.78 | 2.73E-03 | 2.31E-02 | ATP2B2   |
| cspg4      | ENSDARG00000078227 | -2.10 | 1.20 | 2.60E-03 | 2.24E-02 | CSPG4    |
| dnmt3aa    | ENSDARG00000005394 | -2.09 | 4.12 | 2.08E-07 | 1.16E-05 | DNMT3A   |
| cfh        | ENSDARG00000075761 | -2.09 | 6.04 | 2.33E-07 | 1.27E-05 | CFH      |
| col4a1     | ENSDARG00000055009 | -2.09 | 6.56 | 6.09E-07 | 2.96E-05 | COL4A1   |
| spen       | ENSDARG00000074245 | -2.08 | 5.32 | 1.38E-07 | 8.31E-06 | SPEN     |
| nfic       | ENSDARG00000043210 | -2.08 | 6.81 | 6.52E-08 | 4.41E-06 | NFIC     |
| MAP3K15    | ENSDARG00000013310 | -2.08 | 3.26 | 1.15E-05 | 3.41E-04 | MAP3K15  |
| cpeb3      | ENSDARG00000060103 | -2.08 | 2.63 | 4.94E-04 | 6.48E-03 | CPEB3    |
| smap2      | ENSDARG00000061446 | -2.07 | 2.43 | 1.35E-04 | 2.44E-03 | SMAP2    |
| itga3a     | ENSDARG00000037917 | -2.07 | 5.81 | 6.76E-06 | 2.25E-04 | ITGA3    |
| zbtb43     | ENSDARG00000045983 | -2.07 | 1.21 | 1.61E-03 | 1.57E-02 | ZBTB43   |
| fat1a      | ENSDARG00000017591 | -2.07 | 6.35 | 2.18E-07 | 1.20E-05 | FAT1     |
| aip        | ENSDARG00000069699 | -2.06 | 4.45 | 2.31E-04 | 3.67E-03 | AIP      |

|                  |                     |       |      |          |          |          |
|------------------|---------------------|-------|------|----------|----------|----------|
| BBX              | ENSDARG00000012699  | -2.05 | 2.38 | 4.76E-04 | 6.33E-03 | BBX      |
| flncb            | ENSDARG00000018820  | -2.05 | 4.66 | 1.23E-07 | 7.51E-06 | FLNC     |
| b3gat2           | ENSDARG00000030733  | -2.04 | 2.13 | 2.24E-04 | 3.59E-03 | B3GAT2   |
| pdgfrb           | ENSDARG00000057345  | -2.04 | 4.25 | 3.90E-06 | 1.43E-04 | PDGFRB   |
| si:dkey-11f4.16  | ENSDARG00000076224  | -2.04 | 2.97 | 1.06E-04 | 2.02E-03 | CD58     |
| ankrd52a         | ENSDARG00000036826  | -2.03 | 3.98 | 8.73E-07 | 4.00E-05 | ANKRD52  |
| slco5a1          | ENSDARG00000071685  | -2.03 | 4.84 | 9.05E-06 | 2.82E-04 | SLCO5A1  |
| znf106a          | ENSDARG00000016651  | -2.03 | 7.82 | 4.49E-08 | 3.22E-06 | ZNF106   |
| zgc:112334       | ENSDARG00000005879  | -2.02 | 2.08 | 2.81E-04 | 4.27E-03 | GDI1     |
| dmd              | ENSDARG00000008487  | -2.02 | 3.37 | 4.95E-05 | 1.12E-03 | DMD      |
| kif5bb           | ENSDARG00000075251  | -2.02 | 3.46 | 1.31E-05 | 3.80E-04 | KIF5B    |
| SLC39A14         | ENSDARG00000090174  | -2.02 | 2.33 | 2.54E-04 | 3.97E-03 | SLC39A14 |
| zzef1            | ENSDARG00000094380  | -2.01 | 5.01 | 6.32E-08 | 4.29E-06 | ZZEF1    |
| ahnak            | ENSDARG00000061764  | -2.00 | 8.28 | 2.23E-07 | 1.22E-05 | AHNAK    |
| si:dkey-32e23.4  | ENSDARG00000063159  | -2.00 | 2.83 | 7.19E-05 | 1.48E-03 | DNM1L    |
| nphs1            | ENSDARG00000060758  | -2.00 | 4.52 | 1.07E-06 | 4.77E-05 | NPHS1    |
| tet3             | ENSDARG00000062646  | -2.00 | 5.38 | 2.60E-07 | 1.38E-05 | TET3     |
| PLA2R1           | ENSDARG00000077474  | -1.99 | 3.05 | 6.16E-05 | 1.31E-03 | PLA2R1   |
| epas1b           | ENSDARG00000057671  | -1.98 | 5.09 | 1.93E-06 | 7.83E-05 | EPAS1    |
| dgcr2            | ENSDARG00000042962  | -1.98 | 3.60 | 3.30E-05 | 8.03E-04 | DGCR2    |
| gch1             | ENSDARG00000070453  | -1.98 | 1.64 | 1.11E-03 | 1.19E-02 | GCH1     |
| FAT4             | ENSDARG00000045665  | -1.98 | 2.50 | 3.06E-04 | 4.50E-03 | FAT4     |
| sst3             | ENSDARG00000031649  | -1.98 | 2.21 | 1.41E-03 | 1.43E-02 | sst3     |
| pdk3a            | ENSDARG00000014527  | -1.98 | 4.23 | 3.45E-05 | 8.36E-04 | PDK3     |
| lck              | ENSDARG00000059282  | -1.97 | 2.01 | 1.06E-03 | 1.15E-02 | LCK      |
| enpp1            | ENSDARG00000005789  | -1.97 | 6.60 | 6.33E-06 | 2.15E-04 | ENPP1    |
| dnah9            | ENSDARG00000004221  | -1.97 | 2.93 | 8.37E-05 | 1.67E-03 | DNAH9    |
| sypa             | ENSDARG00000042974  | -1.96 | 1.26 | 3.67E-03 | 2.86E-02 | SYP      |
| ffr50            | ENSDARG000000054153 | -1.96 | 1.54 | 1.47E-03 | 1.48E-02 | ffr50    |
| cdhr1a           | ENSDARG00000004643  | -1.95 | 3.85 | 4.86E-06 | 1.73E-04 | CDHR1    |
| cyp2aa7          | ENSDARG00000091601  | -1.95 | 2.17 | 8.77E-04 | 9.96E-03 | cyp2aa7  |
| sema4ga          | ENSDARG00000076595  | -1.95 | 1.30 | 2.11E-03 | 1.90E-02 | SEMA4G   |
| atp1a3a          | ENSDARG00000018259  | -1.95 | 6.26 | 1.35E-05 | 3.92E-04 | ATP1A3   |
| gpa33            | ENSDARG00000040898  | -1.95 | 3.66 | 7.17E-05 | 1.48E-03 | GPA33    |
| ccdc85ca         | ENSDARG00000005232  | -1.95 | 2.74 | 2.89E-04 | 4.34E-03 | CCDC85C  |
| si:ch211-133n4.7 | ENSDARG00000095424  | -1.94 | 3.97 | 1.64E-03 | 1.59E-02 | CLEC4E   |
| ehd3             | ENSDARG00000007869  | -1.94 | 4.36 | 1.53E-06 | 6.45E-05 | EHD3     |
| CACUL1           | ENSDARG00000021885  | -1.93 | 2.26 | 7.17E-04 | 8.63E-03 | CACUL1   |
| FAM107A          | ENSDARG00000086300  | -1.93 | 2.22 | 7.16E-04 | 8.63E-03 | FAM107A  |
| pitpnb           | ENSDARG00000036005  | -1.93 | 5.20 | 4.25E-07 | 2.17E-05 | PITPNB   |
| slc41a1          | ENSDARG00000070214  | -1.93 | 1.63 | 2.97E-03 | 2.46E-02 | SLC41A1  |
| golgb1           | ENSDARG00000061951  | -1.93 | 6.19 | 8.23E-07 | 3.79E-05 | GOLGB1   |
| kank2            | ENSDARG00000018393  | -1.93 | 2.93 | 1.91E-04 | 3.16E-03 | KANK2    |
| COL13A1          | ENSDARG00000091398  | -1.93 | 2.19 | 1.44E-03 | 1.45E-02 | COL13A1  |
| SEMA4C           | ENSDARG00000079611  | -1.92 | 3.69 | 8.32E-06 | 2.65E-04 | SEMA4C   |
| pcdh1b           | ENSDARG00000036175  | -1.92 | 5.53 | 4.73E-06 | 1.70E-04 | PCDH1    |
| WWC1             | ENSDARG00000076041  | -1.92 | 3.25 | 7.05E-04 | 8.54E-03 | WWC1     |
| SPTBN5           | ENSDARG00000097683  | -1.92 | 6.84 | 6.42E-07 | 3.12E-05 | SPTBN5   |
| ches1            | ENSDARG00000043553  | -1.92 | 1.23 | 3.19E-03 | 2.58E-02 | ches1    |

|                 |                    |       |      |          |          |          |
|-----------------|--------------------|-------|------|----------|----------|----------|
| trak1           | ENSDARG00000041304 | -1.92 | 5.76 | 1.74E-06 | 7.14E-05 | TRAK1    |
| CCDC178         | ENSDARG00000090429 | -1.91 | 1.83 | 7.58E-03 | 4.82E-02 | CCDC178  |
| unc5b           | ENSDARG00000033327 | -1.91 | 4.74 | 8.91E-05 | 1.75E-03 | UNC5B    |
| zbtb44          | ENSDARG00000061110 | -1.91 | 2.10 | 3.55E-03 | 2.79E-02 | ZBTB44   |
| ZNF462          | ENSDARG00000063381 | -1.91 | 4.29 | 1.80E-06 | 7.34E-05 | ZNF462   |
| NACC1           | ENSDARG00000078238 | -1.89 | 1.35 | 3.62E-03 | 2.83E-02 | NACC1    |
| ahcy12          | ENSDARG00000039343 | -1.89 | 7.65 | 1.26E-04 | 2.29E-03 | AHCYL2   |
| mark2b          | ENSDARG00000032458 | -1.89 | 7.01 | 6.79E-07 | 3.26E-05 | MARK2    |
| dhh             | ENSDARG00000037062 | -1.88 | 5.56 | 2.75E-06 | 1.06E-04 | DHH      |
| histh11         | ENSDARG00000035519 | -1.88 | 7.21 | 2.29E-05 | 5.97E-04 | HIST1H1E |
| ptch2           | ENSDARG00000055026 | -1.88 | 3.08 | 4.79E-04 | 6.36E-03 | PTCH2    |
| naalad2         | ENSDARG00000021383 | -1.88 | 6.57 | 5.37E-06 | 1.87E-04 | NAALAD2  |
| lyst            | ENSDARG00000008575 | -1.87 | 5.05 | 1.32E-06 | 5.65E-05 | LYST     |
| gpd2            | ENSDARG00000062430 | -1.87 | 4.88 | 1.40E-06 | 5.93E-05 | GPD2     |
| glsa            | ENSDARG00000062812 | -1.86 | 3.24 | 1.83E-04 | 3.07E-03 | GLS      |
| sema4f          | ENSDARG00000079014 | -1.86 | 1.09 | 4.23E-03 | 3.18E-02 | SEMA4F   |
| slc26a2         | ENSDARG00000011618 | -1.85 | 4.42 | 1.76E-03 | 1.67E-02 | SLC26A2  |
| lrp2a           | ENSDARG00000060649 | -1.85 | 9.00 | 2.31E-06 | 9.20E-05 | LRP2     |
| mxd1            | ENSDARG00000032039 | -1.83 | 3.05 | 3.43E-04 | 4.92E-03 | MXD1     |
| FOXJ3           | ENSDARG00000075774 | -1.83 | 2.97 | 3.72E-04 | 5.21E-03 | FOXJ3    |
| anks1ab         | ENSDARG00000078901 | -1.83 | 1.21 | 6.87E-03 | 4.49E-02 | ANKS1a   |
| slc25a37        | ENSDARG00000073743 | -1.83 | 5.67 | 5.98E-05 | 1.28E-03 | SLC25A37 |
| pygo1           | ENSDARG00000044963 | -1.83 | 1.50 | 2.72E-03 | 2.31E-02 | PYGO1    |
| ankrd11         | ENSDARG00000051886 | -1.83 | 6.62 | 1.63E-06 | 6.80E-05 | ANKRD11  |
| prkcz           | ENSDARG00000043332 | -1.83 | 2.96 | 3.57E-04 | 5.06E-03 | PRKCZ    |
| chst12a         | ENSDARG00000028786 | -1.83 | 2.13 | 1.49E-03 | 1.49E-02 | CHST12   |
| atm             | ENSDARG00000063465 | -1.83 | 2.29 | 2.06E-03 | 1.87E-02 | ATM      |
| slc27a4         | ENSDARG00000017047 | -1.82 | 3.41 | 7.76E-05 | 1.57E-03 | SLC27A4  |
| usp34           | ENSDARG00000037734 | -1.82 | 2.78 | 1.88E-04 | 3.14E-03 | USP34    |
| egln2           | ENSDARG00000062562 | -1.82 | 3.95 | 4.60E-06 | 1.66E-04 | EGLN2    |
| frem3           | ENSDARG00000074677 | -1.82 | 1.32 | 6.89E-03 | 4.50E-02 | FREM2    |
| flrt2           | ENSDARG00000079355 | -1.82 | 3.55 | 7.40E-05 | 1.51E-03 | FLRT2    |
| numb            | ENSDARG00000027279 | -1.81 | 5.82 | 1.37E-05 | 3.97E-04 | NUMB     |
| lama1           | ENSDARG00000056043 | -1.81 | 1.86 | 3.28E-03 | 2.63E-02 | LAMA1    |
| SBNO1           | ENSDARG00000087600 | -1.81 | 2.18 | 1.27E-03 | 1.32E-02 | SBNO1    |
| scinlb          | ENSDARG00000058348 | -1.81 | 8.75 | 1.93E-06 | 7.83E-05 | scinl    |
| si:dkeyp-87a6.1 | ENSDARG00000056888 | -1.81 | 5.75 | 1.21E-04 | 2.22E-03 | DNAH5    |
| lamb1b          | ENSDARG00000045524 | -1.80 | 5.61 | 3.59E-04 | 5.08E-03 | lamb1    |
| DST             | ENSDARG00000024748 | -1.80 | 6.70 | 2.62E-06 | 1.02E-04 | DST      |
| azi2            | ENSDARG00000042997 | -1.80 | 3.97 | 1.05E-04 | 2.00E-03 | AZI2     |
| RPS6KA5         | ENSDARG00000060551 | -1.80 | 3.85 | 4.81E-04 | 6.38E-03 | RPS6KA5  |
| cept1a          | ENSDARG00000058716 | -1.79 | 3.04 | 3.13E-03 | 2.55E-02 | CHPT1    |
| MXD4            | ENSDARG00000054031 | -1.79 | 3.07 | 4.43E-04 | 6.01E-03 | MXD4     |
| CTIF            | ENSDARG00000090617 | -1.79 | 2.25 | 1.35E-03 | 1.39E-02 | CTIF     |
| TBC1D10C        | ENSDARG00000037408 | -1.79 | 5.25 | 4.44E-06 | 1.60E-04 | TBC1D10C |
| kmt2a           | ENSDARG00000004537 | -1.78 | 6.67 | 1.63E-05 | 4.54E-04 | KMT2A    |
| prune2          | ENSDARG00000059423 | -1.78 | 4.30 | 3.62E-05 | 8.68E-04 | PRUNE2   |
| nudt3b          | ENSDARG00000042123 | -1.77 | 2.46 | 7.87E-04 | 9.17E-03 | NUDT3    |
| hcn2b           | ENSDARG00000061665 | -1.77 | 2.30 | 2.89E-03 | 2.41E-02 | HCN2     |

|          |                    |       |      |          |          |          |
|----------|--------------------|-------|------|----------|----------|----------|
| slc7a1   | ENSDARG00000016439 | -1.77 | 2.65 | 1.14E-03 | 1.22E-02 | SLC7A1   |
| prrlb    | ENSDARG00000045955 | -1.77 | 5.64 | 1.22E-05 | 3.60E-04 | PRLR     |
| appa     | ENSDARG00000059036 | -1.76 | 5.91 | 3.33E-06 | 1.25E-04 | APP      |
| pho      | ENSDARG00000035133 | -1.76 | 3.23 | 1.59E-04 | 2.77E-03 | pho      |
| alox5a   | ENSDARG00000057273 | -1.76 | 5.18 | 7.49E-06 | 2.43E-04 | ALOX5    |
| arhgap31 | ENSDARG00000059472 | -1.76 | 4.25 | 1.99E-05 | 5.37E-04 | arhgap31 |
| UGT8     | ENSDARG00000037455 | -1.75 | 5.21 | 2.15E-05 | 5.72E-04 | UGT8     |

**Supplementary Table 2 - GSEA signatures for zap70y442 downregulated genes**

| Zap70 <sup>y442</sup> vs wt downregulated genes GSEA gene signatures |                         |                        |        |          |             |
|----------------------------------------------------------------------|-------------------------|------------------------|--------|----------|-------------|
| Gene Set Name                                                        | # Genes in Gene Set (K) | # Genes in Overlap (k) | k/K    | p-value  | FDR q-value |
| BLALOCK_ALZHEIMERS_DISEASE_UP                                        | 1691                    | 66                     | 0.039  | 2.00E-24 | 1.93E-20    |
| YOSHIMURA_MAPK8_TARGETS_UP                                           | 1305                    | 56                     | 0.0429 | 1.09E-22 | 5.24E-19    |
| GRAESSMANN_APOPTOSIS_BY_DOXORUBICIN_DN                               | 1781                    | 62                     | 0.0348 | 1.91E-20 | 6.13E-17    |
| BENPORATH_ES_WITH_H3K27ME3                                           | 1118                    | 48                     | 0.0429 | 1.52E-19 | 3.66E-16    |
| BENPORATH_SUZ12_TARGETS                                              | 1038                    | 46                     | 0.0443 | 2.68E-19 | 5.17E-16    |
| BRUINS_UVC_RESPONSE_VIA_TP53_GROUP_A                                 | 898                     | 42                     | 0.0468 | 1.55E-18 | 2.50E-15    |
| MEISSNER_BRAIN_HCP_WITH_H3K4ME3_AND_H3K27ME3                         | 1069                    | 45                     | 0.0421 | 4.73E-18 | 6.52E-15    |
| NABA_MATRISOME                                                       | 1028                    | 43                     | 0.0418 | 3.44E-17 | 4.15E-14    |
| DACOSTA_UV_RESPONSE_VIA_ERCC3_DN                                     | 855                     | 39                     | 0.0456 | 6.43E-17 | 6.89E-14    |
| GOBERT_OLIGODENDROCYTE_DIFFERENTIATION_DN                            | 1080                    | 43                     | 0.0398 | 2.00E-16 | 1.93E-13    |
| NABA_CORE_MATRISOME                                                  | 275                     | 23                     | 0.0836 | 6.29E-16 | 5.52E-13    |
| GOZGIT_ESR1_TARGETS_DN                                               | 781                     | 36                     | 0.0461 | 7.73E-16 | 6.22E-13    |
| WONG_ADULT_TISSUE_STEM_MODULE                                        | 721                     | 34                     | 0.0472 | 2.62E-15 | 1.95E-12    |
| BOQUEST_STEM_CELL_CULTURED_VS_FRESH_UP                               | 425                     | 26                     | 0.0612 | 1.42E-14 | 9.80E-12    |
| PID_INTEGRIN1_PATHWAY                                                | 66                      | 13                     | 0.197  | 1.95E-14 | 1.25E-11    |
| KEGG_ECM_RECEPTOR_INTERACTION                                        | 84                      | 14                     | 0.1667 | 2.23E-14 | 1.35E-11    |
| SCHAEFFER_PROSTATE_DEVELOPMENT_6HR_DN                                | 514                     | 28                     | 0.0545 | 2.43E-14 | 1.38E-11    |
| MILI_PSEUDOPODIA_CHEMOTAXIS_DN                                       | 457                     | 26                     | 0.0569 | 7.70E-14 | 4.13E-11    |
| RIGGI_EWING_SARCOMA_PROGENITOR_UP                                    | 430                     | 25                     | 0.0581 | 1.45E-13 | 7.34E-11    |
| KINSEY_TARGETS_OF_EWSR1_FLII_FUSION_DN                               | 329                     | 22                     | 0.0669 | 2.66E-13 | 1.18E-10    |
| GSE14699_NAIVE_VS_DELETIONAL_TOLERANCE_CD8_TCELL_DN                  | 200                     | 18                     | 0.09   | 2.69E-13 | 1.18E-10    |
| GSE7460_TCONV_VS_TREG_LN_UP                                          | 200                     | 18                     | 0.09   | 2.69E-13 | 1.18E-10    |
| BUYTAERT_PHOTODYNAMIC_THERAPY_STRESS_UP                              | 811                     | 33                     | 0.0407 | 4.11E-13 | 1.72E-10    |
| FEVR_CTNNB1_TARGETS_UP                                               | 682                     | 30                     | 0.044  | 7.09E-13 | 2.79E-10    |
| BROWNE_HCMV_INFECTION_48HR_DN                                        | 504                     | 26                     | 0.0516 | 7.24E-13 | 2.79E-10    |
| REACTOME_AXON_GUIDANCE                                               | 251                     | 19                     | 0.0757 | 1.30E-12 | 4.82E-10    |
| DELYS_THYROID_CANCER_UP                                              | 443                     | 24                     | 0.0542 | 2.01E-12 | 7.19E-10    |
| SANSOM_APC_TARGETS_DN                                                | 366                     | 22                     | 0.0601 | 2.23E-12 | 7.68E-10    |
| GSE33374_CD8_ALPHAALPHA_VS_ALPHABETA_CD161_HIGH_TCELL_UP             | 200                     | 17                     | 0.085  | 3.13E-12 | 9.75E-10    |
| GSE7460_FOXP3_MUT_VS_WT_ACT_TCONV_DN                                 | 200                     | 17                     | 0.085  | 3.13E-12 | 9.75E-10    |
| GSE7852_TREG_VS_TCONV_LN_DN                                          | 200                     | 17                     | 0.085  | 3.13E-12 | 9.75E-10    |
| PID_INTEGRIN3_PATHWAY                                                | 43                      | 10                     | 0.2326 | 3.48E-12 | 1.05E-09    |
| MIKKELSEN_MEF_HCP_WITH_H3K27ME3                                      | 590                     | 27                     | 0.0458 | 4.19E-12 | 1.22E-09    |
| REACTOME_INTEGRIN_CELL_SURFACE_INTERACTIONS                          | 79                      | 12                     | 0.1519 | 5.15E-12 | 1.46E-09    |
| ZWANG_TRANSIENTLY_UP_BY_1ST_EGF_PULSE_ONLY                           | 1839                    | 49                     | 0.0266 | 5.81E-12 | 1.60E-09    |
| BENPORATH_EED_TARGETS                                                | 1062                    | 36                     | 0.0339 | 6.71E-12 | 1.80E-09    |
| BENPORATH_PRC2_TARGETS                                               | 652                     | 28                     | 0.0429 | 7.44E-12 | 1.94E-09    |
| DACOSTA_UV_RESPONSE_VIA_ERCC3_COMMON_DN                              | 483                     | 24                     | 0.0497 | 1.23E-11 | 3.12E-09    |
| MILI_PSEUDOPODIA_HAPTOTAXIS_DN                                       | 668                     | 28                     | 0.0419 | 1.31E-11 | 3.24E-09    |
| LIM_MAMMARY_STEM_CELL_UP                                             | 489                     | 24                     | 0.0491 | 1.59E-11 | 3.83E-09    |
| ONDER_CDH1_TARGETS_2_UP                                              | 256                     | 18                     | 0.0703 | 1.75E-11 | 4.11E-09    |
| GAVIN_FOXP3_TARGETS_CLUSTER_P7                                       | 90                      | 12                     | 0.1333 | 2.53E-11 | 5.81E-09    |
| PEREZ_TP53_TARGETS                                                   | 1174                    | 37                     | 0.0315 | 2.72E-11 | 6.10E-09    |
| CHARAFE_BREAST_CANCER_LUMINAL_VS_MESENCHYMAL_DN                      | 460                     | 23                     | 0.05   | 2.93E-11 | 6.42E-09    |
| GSE3982_BCELL_VS_CENT_MEMORY_CD4_TCELL_DN                            | 200                     | 16                     | 0.08   | 3.42E-11 | 7.18E-09    |
| GSE3982_MEMORY_CD4_TCELL_VS_BCELL_UP                                 | 200                     | 16                     | 0.08   | 3.42E-11 | 7.18E-09    |
| KEGG_FOCAL_ADHESION                                                  | 201                     | 16                     | 0.0796 | 3.69E-11 | 7.57E-09    |
| DODD_NASOPHARYNGEAL_CARCINOMA_UP                                     | 1821                    | 47                     | 0.0258 | 4.77E-11 | 9.58E-09    |
| SCHUETZ_BREAST_CANCER_DUCTAL_INVASIVE_UP                             | 351                     | 20                     | 0.057  | 5.86E-11 | 1.14E-08    |
| NABA_BASEMENT_MEMBRANES                                              | 40                      | 9                      | 0.225  | 5.90E-11 | 1.14E-08    |
| SWEET_LUNG_CANCER_KRAS_DN                                            | 435                     | 22                     | 0.0506 | 6.38E-11 | 1.21E-08    |
| MARTINEZ_RB1_TARGETS_UP                                              | 673                     | 27                     | 0.0401 | 8.16E-11 | 1.51E-08    |
| KEGG_PATHWAYS_IN_CANCER                                              | 328                     | 19                     | 0.0579 | 1.34E-10 | 2.45E-08    |
| IVANOVA_HEMATOPOIESIS_STEM_CELL                                      | 254                     | 17                     | 0.0669 | 1.38E-10 | 2.47E-08    |
| SENESE_HDAC3_TARGETS_UP                                              | 501                     | 23                     | 0.0459 | 1.58E-10 | 2.77E-08    |
| SMID_BREAST_CANCER_BASAL_DN                                          | 701                     | 27                     | 0.0385 | 2.01E-10 | 3.46E-08    |
| REACTOME_L1CAM_INTERACTIONS                                          | 86                      | 11                     | 0.1279 | 2.72E-10 | 4.61E-08    |
| GSE11057_EFF_MEM_VS_CENT_MEM_CD4_TCELL_UP                            | 200                     | 15                     | 0.075  | 3.49E-10 | 5.62E-08    |
| GSE13522_CTRL_VS_T_CRUZI_Y_STRAIN_INF_SKIN_IFNAR_KO_UP               | 200                     | 15                     | 0.075  | 3.49E-10 | 5.62E-08    |
| HALLMARK_MYOGENESIS                                                  | 200                     | 15                     | 0.075  | 3.49E-10 | 5.62E-08    |
| MEISSNER_NPC_HCP_WITH_H3K4ME2_AND_H3K27ME3                           | 349                     | 19                     | 0.0544 | 3.82E-10 | 6.04E-08    |
| BAELDE_DIABETIC_NEPHROPATHY_DN                                       | 434                     | 21                     | 0.0484 | 3.89E-10 | 6.05E-08    |
| CUI_TCF21_TARGETS_2_DN                                               | 830                     | 29                     | 0.0349 | 4.05E-10 | 6.20E-08    |
| LIU_PROSTATE_CANCER_DN                                               | 481                     | 22                     | 0.0457 | 4.26E-10 | 6.42E-08    |
| BLALOCK_ALZHEIMERS_DISEASE_DN                                        | 1237                    | 36                     | 0.0291 | 4.44E-10 | 6.60E-08    |
| REACTOME_DEVELOPMENTAL_BIOLOGY                                       | 396                     | 20                     | 0.0505 | 4.88E-10 | 7.13E-08    |
| LIAO_METASTASIS                                                      | 539                     | 23                     | 0.0427 | 6.50E-10 | 9.36E-08    |
| PEDERSEN_METASTASIS_BY_ERBB2_ISOFORM_7                               | 403                     | 20                     | 0.0496 | 6.60E-10 | 9.37E-08    |
| ONDER_CDH1_TARGETS_2_DN                                              | 464                     | 21                     | 0.0453 | 1.29E-09 | 1.80E-07    |
| JAATINEN_HEMATOPOIETIC_STEM_CELL_DN                                  | 226                     | 15                     | 0.0664 | 1.90E-09 | 2.61E-07    |
| LINDGREN_BLADDER_CANCER_CLUSTER_3_DN                                 | 229                     | 15                     | 0.0655 | 2.27E-09 | 3.09E-07    |
| CREIGHTON_ENDOCRINE_THERAPY_RESISTANCE_4                             | 307                     | 17                     | 0.0554 | 2.50E-09 | 3.36E-07    |
| NABA_ECM_GLYCOPROTEINS                                               | 196                     | 14                     | 0.0714 | 2.56E-09 | 3.38E-07    |



|                                                                     |      |    |        |          |          |
|---------------------------------------------------------------------|------|----|--------|----------|----------|
| MCBRYAN_PUBERTAL_BREAST_6_7WK_UP                                    | 197  | 14 | 0.0711 | 2.73E-09 | 3.56E-07 |
| NAKAMURA_TUMOR_ZONE_PERIPHERAL_VS_CENTRAL_DN                        | 634  | 24 | 0.0379 | 2.91E-09 | 3.75E-07 |
| GSE10325_CD4_TCELL_VS_BCELL_UP                                      | 200  | 14 | 0.07   | 3.32E-09 | 3.96E-07 |
| GSE20366_TREG_VS_NAIVE_CD4_TCELL_DN                                 | 200  | 14 | 0.07   | 3.32E-09 | 3.96E-07 |
| GSE22886_NAIVE_CD8_TCELL_VS_NKCELL_DN                               | 200  | 14 | 0.07   | 3.32E-09 | 3.96E-07 |
| GSE23568_CTRL_TRANSDUCE_VS_WT_CD8_TCELL_DN                          | 200  | 14 | 0.07   | 3.32E-09 | 3.96E-07 |
| GSE35685_CD34POS_CD38NEG_VS_CD34POS_CD10NEG_CD62LPOS_BONE_MARROW_DN | 200  | 14 | 0.07   | 3.32E-09 | 3.96E-07 |
| HALLMARK_ESTROGEN_RESPONSE_EARLY                                    | 200  | 14 | 0.07   | 3.32E-09 | 3.96E-07 |
| MARTINEZ_TP53_TARGETS_DN                                            | 593  | 23 | 0.0388 | 3.97E-09 | 4.67E-07 |
| NUYTEN_EZH2_TARGETS_UP                                              | 1037 | 31 | 0.0299 | 4.09E-09 | 4.71E-07 |
| KEGG_HYPERTROPHIC_CARDIOMYOPATHY_HCM                                | 85   | 10 | 0.1176 | 4.10E-09 | 4.71E-07 |
| DAZARD_RESPONSE_TO_UV_NHEK_DN                                       | 318  | 17 | 0.0535 | 4.24E-09 | 4.82E-07 |
| BRUECKNER_TARGETS_OF_MIRLET7A3_UP                                   | 111  | 11 | 0.0991 | 4.33E-09 | 4.86E-07 |
| PICCALUGA_ANGIOIMMUNOBLASTIC_LYMPHOMA_UP                            | 205  | 14 | 0.0683 | 4.56E-09 | 5.06E-07 |
| WANG_SMARCE1_TARGETS_UP                                             | 280  | 16 | 0.0571 | 4.73E-09 | 5.19E-07 |
| REACTOME_NCAM_SIGNALING_FOR_NEURITE_OUT_GROWTH                      | 64   | 9  | 0.1406 | 4.94E-09 | 5.36E-07 |
| MARTINEZ_RB1_AND_TP53_TARGETS_UP                                    | 601  | 23 | 0.0383 | 5.10E-09 | 5.47E-07 |
| FOSTER_TOLERANT_MACROPHAGE_DN                                       | 409  | 19 | 0.0465 | 5.21E-09 | 5.52E-07 |
| CHANG_IMMORTALIZED_BY_HP131_DN                                      | 65   | 9  | 0.1385 | 5.69E-09 | 5.97E-07 |
| REACTOME_TRANSMEMBRANE_TRANSPORT_OF_SMALL_MOLECULES                 | 413  | 19 | 0.046  | 6.09E-09 | 6.32E-07 |
| WILCOX_RESPONSE_TO_PROGESTERONE_DN                                  | 66   | 9  | 0.1364 | 6.54E-09 | 6.71E-07 |
| KAAB_HEART_ATRIUM_VS_VENTRICLE_UP                                   | 249  | 15 | 0.0602 | 7.07E-09 | 7.18E-07 |
| GABRIELY_MIR21_TARGETS                                              | 289  | 16 | 0.0554 | 7.41E-09 | 7.45E-07 |
| CHICAS_RB1_TARGETS_CONFLUENT                                        | 567  | 22 | 0.0388 | 8.63E-09 | 8.59E-07 |
| KEGG_DILATED_CARDIOMYOPATHY                                         | 92   | 10 | 0.1087 | 8.94E-09 | 8.80E-07 |
| LOPEZ_MBD_TARGETS                                                   | 957  | 29 | 0.0303 | 9.79E-09 | 9.54E-07 |
| CHIARADONNA_NEOPLASTIC_TRANSFORMATION_CDC25_UP                      | 120  | 11 | 0.0917 | 9.91E-09 | 9.56E-07 |

**Supplementary Table 3 - GO term List for zap70<sup>y442</sup> downregulated genes**

| Zap70 <sup>y442</sup> vs wt downregulated genes associated Go Terms |                         |                        |        |          |             |
|---------------------------------------------------------------------|-------------------------|------------------------|--------|----------|-------------|
| Gene Set Name                                                       | # Genes in Gene Set (K) | # Genes in Overlap (k) | k/K    | p-value  | FDR q-value |
| PLASMA_MEMBRANE                                                     | 1426                    | 72                     | 0.0505 | 1.49E-33 | 2.16E-30    |
| MEMBRANE                                                            | 1994                    | 83                     | 0.0416 | 8.78E-33 | 6.38E-30    |
| MEMBRANE_PART                                                       | 1670                    | 75                     | 0.0449 | 1.18E-31 | 5.72E-29    |
| PLASMA_MEMBRANE_PART                                                | 1158                    | 61                     | 0.0527 | 2.17E-29 | 7.89E-27    |
| INTRINSIC_TO_MEMBRANE                                               | 1348                    | 63                     | 0.0467 | 1.73E-27 | 5.03E-25    |
| INTEGRAL_TO_MEMBRANE                                                | 1330                    | 62                     | 0.0466 | 5.40E-27 | 1.31E-24    |
| INTRINSIC_TO_PLASMA_MEMBRANE                                        | 991                     | 54                     | 0.0545 | 9.43E-27 | 1.96E-24    |
| INTEGRAL_TO_PLASMA_MEMBRANE                                         | 977                     | 53                     | 0.0542 | 3.57E-26 | 6.49E-24    |
| ANATOMICAL_STRUCTURE_DEVELOPMENT                                    | 1013                    | 46                     | 0.0454 | 1.03E-19 | 1.67E-17    |
| SIGNAL_TRANSDUCTION                                                 | 1634                    | 57                     | 0.0349 | 7.16E-19 | 1.04E-16    |
| SYSTEM_DEVELOPMENT                                                  | 861                     | 41                     | 0.0476 | 2.17E-18 | 2.81E-16    |
| MULTICELLULAR_ORGANISMAL_DEVELOPMENT                                | 1049                    | 45                     | 0.0429 | 2.32E-18 | 2.81E-16    |
| SYSTEM_PROCESS                                                      | 563                     | 32                     | 0.0568 | 9.67E-17 | 1.08E-14    |
| ESTABLISHMENT_OF_LOCALIZATION                                       | 870                     | 37                     | 0.0425 | 3.73E-15 | 3.87E-13    |
| TRANSPORT                                                           | 795                     | 34                     | 0.0428 | 4.37E-14 | 4.24E-12    |
| RECEPTOR_ACTIVITY                                                   | 583                     | 29                     | 0.0497 | 8.26E-14 | 7.51E-12    |
| CELL_SURFACE_RECEPTOR_LINKED_SIGNAL_TRANSDUCTION_GO_0007166         | 641                     | 30                     | 0.0468 | 1.46E-13 | 1.25E-11    |
| CYTOPLASM                                                           | 2131                    | 56                     | 0.0263 | 2.60E-13 | 2.10E-11    |
| NERVOUS_SYSTEM_DEVELOPMENT                                          | 385                     | 23                     | 0.0597 | 7.94E-13 | 6.07E-11    |
| ENZYME_LINKED_RECEPTOR_PROTEIN_SIGNALING_PATHWAY                    | 140                     | 15                     | 0.1071 | 2.10E-12 | 1.53E-10    |
| EXTRACELLULAR_REGION                                                | 447                     | 23                     | 0.0515 | 1.65E-11 | 1.14E-09    |
| PROTEIN_METABOLIC_PROCESS                                           | 1231                    | 38                     | 0.0309 | 2.63E-11 | 1.74E-09    |
| TRANSMEMBRANE_RECEPTOR_ACTIVITY                                     | 418                     | 22                     | 0.0526 | 2.97E-11 | 1.88E-09    |
| EXTRACELLULAR_MATRIX_PART                                           | 57                      | 10                     | 0.1754 | 7.03E-11 | 4.26E-09    |
| PROTEIN_KINASE_ACTIVITY                                             | 285                     | 18                     | 0.0632 | 1.02E-10 | 5.94E-09    |
| BIOPOLYMER_METABOLIC_PROCESS                                        | 1684                    | 44                     | 0.0261 | 1.42E-10 | 7.95E-09    |
| PHOSPHOTRANSFERASE_ACTIVITY_ALCOHOL_GROUP_AS_ACCEPTOR               | 334                     | 19                     | 0.0569 | 1.83E-10 | 9.84E-09    |
| NEUROLOGICAL_SYSTEM_PROCESS                                         | 379                     | 20                     | 0.0528 | 2.27E-10 | 1.18E-08    |
| TRANSFERASE_ACTIVITY_TRANSFERRING_PHOSPHORUS_CONTAINING_GROUPS      | 424                     | 21                     | 0.0495 | 2.55E-10 | 1.28E-08    |
| KINASE_ACTIVITY                                                     | 369                     | 19                     | 0.0515 | 9.66E-10 | 4.64E-08    |
| BASEMENT_MEMBRANE                                                   | 37                      | 8                      | 0.2162 | 9.89E-10 | 4.64E-08    |
| PROTEINACEOUS_EXTRACELLULAR_MATRIX                                  | 98                      | 11                     | 0.1122 | 1.14E-09 | 5.16E-08    |
| PROTEIN_COMPLEX                                                     | 816                     | 28                     | 0.0343 | 1.22E-09 | 5.37E-08    |
| TRANSMEMBRANE_TRANSPORTER_ACTIVITY                                  | 375                     | 19                     | 0.0507 | 1.26E-09 | 5.39E-08    |
| EXTRACELLULAR_MATRIX                                                | 100                     | 11                     | 0.11   | 1.41E-09 | 5.87E-08    |
| MACROMOLECULAR_COMPLEX                                              | 945                     | 30                     | 0.0317 | 1.87E-09 | 7.56E-08    |
| SUBSTRATE_SPECIFIC_TRANSPORTER_ACTIVITY                             | 392                     | 19                     | 0.0485 | 2.61E-09 | 1.03E-07    |
| CELL_CELL_SIGNALING                                                 | 404                     | 19                     | 0.047  | 4.27E-09 | 1.63E-07    |
| EXTRACELLULAR_REGION_PART                                           | 338                     | 17                     | 0.0503 | 1.05E-08 | 3.91E-07    |
| CELL_DEVELOPMENT                                                    | 577                     | 22                     | 0.0381 | 1.18E-08 | 4.29E-07    |
| SUBSTRATE_SPECIFIC_TRANSMEMBRANE_TRANSPORTER_ACTIVITY               | 344                     | 17                     | 0.0494 | 1.36E-08 | 4.82E-07    |
| REGULATION_OF_DEVELOPMENTAL_PROCESS                                 | 440                     | 19                     | 0.0432 | 1.68E-08 | 5.82E-07    |
| CELLULAR_PROTEIN_METABOLIC_PROCESS                                  | 1117                    | 31                     | 0.0278 | 2.24E-08 | 7.57E-07    |
| CELLULAR_MACROMOLECULE_METABOLIC_PROCESS                            | 1131                    | 31                     | 0.0274 | 2.96E-08 | 9.79E-07    |
| ORGAN_DEVELOPMENT                                                   | 571                     | 21                     | 0.0368 | 4.68E-08 | 1.51E-06    |
| TRANSMEMBRANE_RECEPTOR_PROTEIN_TYROSINE_KINASE_SIGNALING_PATH       | 83                      | 9                      | 0.1084 | 5.09E-08 | 1.61E-06    |
| LYMPHOCYTE_ACTIVATION                                               | 61                      | 8                      | 0.1311 | 6.28E-08 | 1.94E-06    |
| INTRACELLULAR_ORGANELLE_PART                                        | 1192                    | 31                     | 0.026  | 9.50E-08 | 2.88E-06    |
| ORGANELLE_PART                                                      | 1197                    | 31                     | 0.0259 | 1.04E-07 | 3.09E-06    |
| LEUKOCYTE_ACTIVATION                                                | 69                      | 8                      | 0.1159 | 1.68E-07 | 4.88E-06    |

**Supplementary Table 4 - PCR primers**

| <i>tcrb</i> and <i>igm</i> transcript expression primers |       |                           |                                                 |
|----------------------------------------------------------|-------|---------------------------|-------------------------------------------------|
| Gene                                                     | PCR # | Forward Primer            | Reverse Primer                                  |
| <i>eef1a1l1</i>                                          | 1     | atggcacggtgacaacatgct     | ccacattaccacgacggatg                            |
| <i>Vb14.5-Cb1</i>                                        | 1     | gaatccaatgtgacgtaaacatgc  | aagatgacaaggccatacagtc                          |
|                                                          | 2     | catgatcataaggaccactacag   | gtccgctcttagcaatggtc                            |
| <i>V16C1</i>                                             | 1     | ctcctaattcaaagtatgaggcaac | tagtctgctggatatggtgtact                         |
|                                                          | 2     | ctcctaattcaaagtatgaggcaac | cttgctgtccaacaaccatgtac                         |
| <i>V27C1</i>                                             | 1     | ccagcaaacagacaacacactc    | tagtctgctggatatggtgtact                         |
|                                                          | 2     | ccagcaaacagacaacacactc    | cttgctgtccaacaaccatgtac                         |
| <i>igVH1-Cm</i>                                          | 1     | gatggacgtgttacaatttg      | acatgaaggttgctgatccac                           |
|                                                          | 2     | cctcctcagactctgtggtga     | ttgctgatccaccttctaattc                          |
| <i>IgVH1-Cm</i>                                          | 1     | catgacaatggatattgtgtcc    | acatgaaggttgctgatccac                           |
|                                                          | 2     | ctctgttggtgtcaaacactg     | ttgctgatccaccttctaattc                          |
| <i>igVH4-Cm</i>                                          | 1     | caagatgaagaatgctctctg     | acatgaaggttgctgatccac                           |
|                                                          | 2     | tgtcaaagtatggagtcca       | ttgctgatccaccttctaattc                          |
| <i>in situ</i> hybridization primers                     |       |                           |                                                 |
| <i>hbae1</i>                                             | 1     | ctccaggatgttgattgtctac    | gccaaagctatttaggtgacactatagctgagaggaactgtccattg |
| <i>lyz</i>                                               | 1     | tttgtgtctggcgtggatg       | gccaaagctatttaggtgacactatagaggctcggaggctttgtttg |
| <i>rag2</i>                                              | 1     | acatcatttcggcggatac       | gccaaagctatttaggtgacactatagtgagcagaaggcttcagg   |
